# Supplementary material for: Risk Factors for Stillbirth and Early Neonatal Mortality: A Case-Control Study in Tertiary Hospitals in Addis Ababa, Ethiopia
Source: Research Square preprint supplement (doi:10.21203/rs.3.rs-37249/v2), 2020-12-16
Supplement: Supplementary file 1 [file 90cb7797c374f16e9fffcd6c.docx]

### DEPARTMENT OF OBSTETRICS & GYNECOLOGY

### SCHOOL OF MEDICINE

**COLLEGE OF HEALTH SCIENCES, Addis Ababa UNIVERSITY**

**Stillbirth and Early Neonatal Death at TAH, GMH& ZMH**

**TOOL A: MOTHER QUESTIONNAIRE**

**Introduction and Consent**

***Purpose of the research:*** Not all pregnancies succeed. Indeed, many end up in delivery of dead babies. Death of the babies can occur before or during labor. Yet, many more mothers may lose their newborns with in few days after delivery. However, most of these deaths are preventable provided that the causes are understood and necessary preventive as well as therapeutic measures are taken. The aims of this study are: 1) to understand why babies die before, during or within few days following delivery.2) to understand the proportion of pregnant mothers who deliver dead babies or lose their live born babies within few days after delivery.

***The study***: We are asking you to grant us your permission to use the information stored in your health chart, delivery chart or your baby’s record to understand and address the above mentioned aims of this study. If a still birth has occurred, we are asking that you grant use your permission to have an autopsy examination on the still born to determine cause of death. This will help us to identify potential problems and prevent future still born cases. If the recorded information is incomplete or ineligible we may ask you or your treating health worker some questions to complete our data collection.

***Benefits:*** The results of this study will help us to learn more on how to prevent and treat death of babies before or after they are delivered, thus enabling us to help people with more knowledge.

***Voluntary nature of the participation:*** You will give us your permission only if you want to. If you don’t want us to use your medical record, your decision is respected and this will not affect the service you have to get from the hospital.􀀁

***Confidentiality:*** You will not be identified in any reports on this study. All the information will be kept confidential. No one else will be able to know about this information.

If you have further questions, you may contact Dr. Eskinder Kebede 0911242900. If you have any questions or concerns regarding your rights as a subject in this study, you may contact the Institutional Review Board at +25 111 15513099, or at Addis Ababa University, College of Health Science, Black Lion Hospital, New Building 7th Floor.

**CONSENT FORM (English version)**

The purpose of this study has clearly been explained to me. I understand what the study is about and what will be asked of me should I agree to participate. I understand that the records of this study will be kept confidential and will not include any records that can be used to identify me. I understand that taking part in this study is completely voluntary and that I may skip any questions that I do not feel comfortable answering.

I have read or listened to the above information, and have received answers to all questions that I have asked. I consent to take part in this study.

Name of the mother: _____________________________

Hospital Registration Number: _____________________

Signature/thumb print of the mother: ____________________

Signature of witness: _______________________

Date of interview (E.C.): ____/____/____

Name of the interviewer: __________________________

Signature of the interviewer: _______________________

Code of interviewer ______________________________

Name of the supervisor: __________________________

Signature of the supervisor: _______________________

**IDENTIFIERS**

**SECTION ONE: SOCIO-DEMOGRAPHIC CHARACTERISTICS OF THE RESPONDENT**

**INSTRUCTION: Now I would like to ask you some questions regarding your background and socioeconomic conditions**

| **Code** | **Item** | **Response options** | **Skip** |
| --- | --- | --- | --- |
| 001 | Where do you live currently? | Addis Ababa………………1  Out of Addis Ababa………………2  Please tell me your address:  REGION: [_____________________]  CITY: [_____________________]  WOREDA: [____________________]  KEBELE: [_____________________] |  |
| 002 | When were you born? | [__|__] Month  Don’t know months………………99  [___|___|___|___] Year  Don’t know months………………99 |  |
| 003 | What is your age in completed years?  COMPARE AND CORRECT 001 AND/OR 002 IF INCONSISTENT. | AGE IN COMPLETED YEARS [___|___] |  |
| 004 | Have you ever attended school? | YES. ………………1  NO ……………… 2 | If NO (2) go to Q006 |
| 005 | What is the highest level of school you attended: primary, secondary, technical/vocational or higher? | PRIMARY (Grade 1-8)………………1  SECONDARY (Grade 9-12)………………2  TECHNICAL/VOCATIONAL…3  HIGHER (University/college)………………4 |  |
| 006 | What is your religion? | ORTHODOX………………1  CATHOLIC………………2  PROTESTANT………………3  MUSLIM………………4  TRADITIONAL………………5  OTHER (SPECIFY) ………………6  [_____________________] |  |
| 007 | What is your marital status? | NEVER MARRIED ………………1  CURRENTLY MARRIED …………2  DIVORCED ………………3  WIDOWED ………………4  OTHER (SPECIFY)………………5  [_____________________] |  |
| 008 | What is your occupation, that is, what kind of work do you mainly do? | HOUSE WIFE………………1  GOVERNMENT EMPLOYED ……2  PRIVATE EMPLOYED ……………3  MERCHANT ………………4  STUDENT………………5  OTHER (SPECIFY)………………6  [_____________________] |  |
| 109 | What is the average monthly income of your household?  PLEASE ADD INCOME OF ALL MEMBERS OF THE HOUSEHOLD | [___|___|___|___|___] Birr |  |

**SECTION TWO: REPRODUCTIVE CHARACTERISTICS OF RESPONDENTS**

**Now I would like to ask you some questions about your (previous) pregnancies, births and related reproductive health characteristics**

| **Code** | **Item** | **Response options** | **Skip** |
| --- | --- | --- | --- |
| 201 | Now I would like to ask about all the pregnancies you have had during your life. During your life how many times have you been pregnant? | # OF TIMES MOTHER WAS PREGNANT [___|___] |  |
| 202 | When you got pregnant with baby you just delivered, did you want to get pregnant at that time? (Planned) | YES. ………………1  NO ……………… 2 | If YES (1) go to Q204 |
| 203 | Did you want to have a baby later on or did you not want any (more) children? | LATER. ………………1  NO MORE ……………… 2 |  |
| 204 | Now I would like to ask about all the births you have had during your life. During your life how many times have you given birth (including the birth you just had here)?(28+GA) | # OF TIMES MOTHER GAVE BIRTH [___|___] |  |
| 205 | Have you ever had a fetus died in utero before birth? | YES. ………………1  NO ……………… 2 | If NO (2) go to Q207 |
| 206 | During your life how many times have you had fetus died in utero? | # OF TIMES MOTHER HAD IUFD [___|___] |  |
| 207 | Have you ever had death of fetus during labour or birth? | YES. ………………1  NO ……………… 2 | If NO (2) go to Q209 |
| 208 | During your life how many times have you had death of fetus during labour or birth? | # OF TIMES MOTHER intrapartum fetal death [___|___] |  |
| 209 | Have you ever given birth to a preterm child (between 28 – 37 weeks of gestation) (including the birth you just had here)? | YES. ………………1  NO ……………… 2 | If NO (2) go to Q211 |
| 210 | During your life how many times have you given birth to a preterm child (between 28 – 37 weeks of gestation) (including the birth you just had here)? | # OF TIMES MOTHER GAVE BIRTH TO PRETERM [___|___] |  |
| 211 | Have you ever had abortion/pregnancy terminated before 28 weeks of gestation? | YES. ………………1  NO ……………… 2 | If NO (2) go to Q213 |
| 212 | During your life how many times have you had abortion/pregnancy terminated before 28 weeks of gestation? | # OF TIMES MOTHER HAD ABORTION [___|___] |  |
| 213 | Have you ever had death of a child within the first 7 days of life? | YES. ………………1  NO ……………… 2 | If NO (2) go to Q215 |
| 214 | During your life how many times have you had death of a child within the first 7 days of life? | # OF TIMES MOTHER HAD EAELY NEONATAL DEATH [___|___] |  |
| 215 | Have you ever had death of a child within the first 28 days of life? | YES. ………………1  NO ……………… 2 | If NO (2) go to Q217 |
| 216 | During your life how many times have you had death of a child within the first 28 days of life? | # OF TIMES MOTHER HAD NEONATAL DEATH [___|___] |  |
| 217 | Have you ever had a child with congenital abnormality? | YES. ………………1  NO ……………… 2 | If NO (2) go to Q219 |
| 218 | During your life how many times have you had a child with congenital abnormality? | # OF CHILD WITHCONGENITAL ABNORMALITY [___|___] |  |
| 219 | Have you ever had any previous other obstetric complications? | YES. ………………1  NO ……………… 2 | If NO (2) go to Q301 |
| 220 | Please tell me all the previous obstetric complications you had? | COMP 1: [_____________________]  COMP 2: [_____________________]  COMP 3: [_____________________]  COMP 4: [_____________________]  COMP 5: [_____________________]  COMP 6: [_____________________] |  |

**SECTION THREE: Substance use**

**Now I would like to ask about use of substance in your life and during pregnancy**

| **Code** | **Item** | **Response options** | **Skip** |
| --- | --- | --- | --- |
| 301 | Have ever smoked cigarettes? | YES. ………………1  NO ……………… 2 | If NO (2) go to Q310 |
| 302 | Do you currently smoke cigarettes? | YES. ………………1  NO ……………… 2 | If NO (2) go to Q304 |
| 303 | In the last 24 hours, how many cigarettes did you smoke? | [___|___] CIGARETTES |  |
| 304 | Were you smoking cigarette anytime during your last pregnancy?? | YES. ………………1  NO ……………… 2 | If NO (2) go to Q310 |
| 305 | How often were you smoking cigarette during your last pregnancy? | Daily. ………………1  Few times per week ……………… 2  Rarely. ………………3 | Go to Q306  Go to Q307 |
| 306 | If you were smoking cigarette daily during your last pregnancy on average how many cigarettes per day did you smoke? | [___|___] CIGARETTES PER DAY |  |
| 307 | If you were smoking cigarette few times per week during your last pregnancy on average how many cigarettes per week did you smoke? | [___|___] CIGARETTES PER WEEK |  |
| 308 | Have you ever taken a drink that contains alcohol (Tella/ Tegi/ Areke/ Beer/ Wine, etc.)? | YES. ………………1  NO ……………… 2 | If NO (2) go to Q313 |
| 309 | During the last 30 days, how many days did you take a drink that contains alcohol? | [___|___] DAYS |  |
| 310 | Were you drinking anything that contains alcohol during your last pregnancy?? | YES. ………………1  NO ……………… 2 | If NO (2) go to Q313 |
| 311 | How often were you drinking anything that contains alcohol during your last pregnancy? | Daily. ………………1  Few times per week ……………… 2  Rarely. ………………3 |  |
| 312 | Have you ever drunk coffee or tea?  CIRCLE ALL MENTIONED | YES, COFFEE. ………………1  YES, TEA ……………… 2  NO. ………………3 | If NO (3) go to Q401 |
| 313 | Were you drinking coffee or tea during your last pregnancy?? | YES, COFFEE. ………………1  YES, TEA ……………… 2  NO. ………………3 | If NO (3) go to Q401 |
| 314 | How often were you drinking coffee or tea during your last pregnancy? | Daily. ………………1  Few times per week ……………… 2  Rarely. ………………3 | Go to Q316  Go to Q317 |
| 315 | If you were drinking coffee or tea daily during your last pregnancy on average how many cup of coffee or tea per day did you drink? | [___|___] CUP OF COFFEE PER DAY  [___|___] CUP OF TEA PER DAY |  |
| 316 | If you were drinking coffee or tea sometimes during your last pregnancy on average how many cup of coffee or tea per week did you drink? | [___|___] CUP OF COFFEE PER WEEK  [___|___] CUP OF TEA PER WEEK |  |

**SECTION FOUR: CONTRACEPTIVE USE**

**Now I would like to ask about the times you or your partner may have used a method to avoid getting pregnant**

| **Code** | **Item** | **Response options** | **Skip** |
| --- | --- | --- | --- |
| 401 | Have you ever used anything or tried in any way to delay or avoid getting pregnant? | YES. ………………1  NO ……………… 2 | If NO (2) go to Q501 |
| 402 | How old were you when you FIRST used a method to delay or avoid getting pregnant? | [___|___] YEARS OLD |  |
| 403 | Which method did you FIRST use to delay or avoid getting pregnant?  DO NOT READ THE METHOD CHOICES. | Female sterilization 1  Male sterilization 2  IUD 3  Injectables 4  Implants 5  Pill 6  Condom 7  Female condom 8  Emergency Contraception…………..9  Standard Days/Cycle Beads………10  Lactational Amen. Method 11  Other modern method 12  Rhythm method 13  Withdrawal 14  Other traditional method 15 |  |
| 404 | When was the last time you used any type of contraceptive method (MOST RECENT METHOD)? | [___|___] MONTHSAGO  [___|___] YEARS AGO |  |
| 405 | Which method did you usebefore (MOST RECENT METHOD) you stopped using contraceptives?  DO NOT READ THE METHOD CHOICES. | Female sterilization 1  Male sterilization 2  IUD 3  Injectables 4  Implants 5  Pill 6  Condom 7  Female condom 8  Emergency Contraception…………..9  Standard Days/Cycle Beads………10  Lactational Amen. Method 11  Other modern method 12  Rhythm method 13  Withdrawal 14  Other traditional method 15 |  |
| 406 | For how long did you use your last contraceptive (MOST RECENT METHOD) before you stopped using? | FOR [___|___] MONTHS  FOR [___|___] YEARS |  |
| 407 | Why did you stop using your (MOST RECENT METHOD)?  Any other reasons?  DO NOT READ THE OPTIONS. | Infrequent sex / husband away 1  Became pregnant while using 2  Wanted to become pregnant 3  Husband / partner disapproved 4  Wanted more effective method 5  No method available 6  Health concerns 7  Side effects 8  Lack of access / too far 9  Costs too much 10  Inconvenient to use 11  Fatalistic 12  Difficult to get pregnant / menopausal 13  Interferes with body’s processes 14  Other 15  Don’t know -88 |  |

**SECTION FIVE: MATERNITY CARE**

**Now I would like to ask you some questions about the antenatal care you received for your last pregnancy.**

| **Code** | **Item** | **Response options** | **Skip** |
| --- | --- | --- | --- |
| 501 | Did you see anyone for antenatal care for your last pregnancy? | YES. ………………1  NO ……………… 2 | If NO (2) go to Q1001 |
| 502 | Whom did you see?  Anyone else?  PROBE TO IDENTIFY EACH TYPE OF PERSON AND RECORD ALL MENTIONED. | HEALTH PERSONNEL  DOCTOR. ………………1  NURSE/MIDWIFE……………… 2  HEW. ………………3  OTHER HEALTH PERSONNEL (SPECIFY) ……………… 4  _________________________  OTHER PERSON  TRAINED TRAD BIRTH ATTENDANT.………………5  UNTRAINED TRAD BIRTH ATTENDANT……………… 6  HDAs. ………………7  OTHER (SPECIFY) ……………… 8  ___________________________ |  |
| 503 | Where did you receive antenatal care for your last pregnancy?  Anywhere else?  PROBE TO IDENTIFY TYPE (S) OF SOURCE (S). | **HOME**  YOUR HOME. ………………1  OTHER HOME……………… 2  **PUBLIC SECTOR**  GOVT. HOSPITAL. ………………3  GOVT. HEALTH CENTER…………4  HEALTH POST.………………5  OTHER PUBLIC……………… 6  ___________________________  **NGO**  HEALTH FACILITY. ………………7  **PRIVATE MED. SECTOR**  PVT. HOSPITAL ……………… 8  PVT. CLINIC ……………… 9  OTHER PRIVATE FACILITY.………10  ___________________________  OTHER (SPECIFY) ……………… 11  ___________________________ |  |
| 504 | How many weeks pregnant were you when you first received antenatal care for your last pregnancy? | [___|___] WEEKS PREGNANT |  |
| 505 | How many times did you receive antenatal care during this pregnancy? | # OF TIMESANC RECEIVED [___|___] |  |

**TOOL B: OBSTETRIC AND NEWBORN CARE SERVICE DATA EXTRACTION FORM**

**Instruction to data collectors: Review the birth charts of the laboring women (and interview care providers as necessary) to complete the data extraction form below**

**SECTIO ONE: LABORATORY INVESTIGATIONS**

| **Code** | **Item** | **Response options** | **Skip** |
| --- | --- | --- | --- |
| 1001 | Height of the mother in centimeter | [___|___|___] CM |  |
| 1002 | Weight of the mother in kilogram | [___|___|___] KG |  |
| 1003 | Hemoglobin level g/dl | [___|___] g/dl |  |
| 1004 | Blood group | A. ………………1  B……………… 2  AB. ………………3  O ……………… 4 |  |
| 1005 | RH factor | POSITIVE. ………………1  NEGATIVE……………… 2  UNKNOWN. ………………3 |  |
| 1006 | VDRL | REACTIVE. ………………1  NON-REACTIVE……………… 2  NOT DONE. ………………3  UNKNOWN. ………………4 |  |
| 1007 | HIV | REACTIVE. ………………1  NON-REACTIVE……………… 2  NOT DONE. ………………3  UNKNOWN. ………………4 |  |
| 1008 | Hb-SAg | REACTIVE. ………………1  NON-REACTIVE……………… 2  NOT DONE. ………………3  UNKNOWN. ………………4 |  |
| 1009 | Number of times urine protein was tested | [___|___] TIMES |  |
| 1010 | What was the last urine protein test result? | TRACE OR +1. ………………1  +2……………… 2  +3. ………………3  +4. ………………4  NOT DONE. ………………5 |  |
| 1011 | Malaria parasite blood test (MP) | POSITIVE. ………………1  NEGATIVE. ………………2  NOT DONE. ………………3 |  |
| 1012 | Laboratory test findings other than those stated above | TYPE OF TEST (1): _________________  FINDING (1): _________________  TYPE OF TEST (2): _________________  FINDING (2): _________________  TYPE OF TEST (3): _________________  FINDING (3): _________________ |  |

**SECTIO TWO: CURRENT MEDICAL CONDITIONS OF THE MOTHER**

| **Code** | | **Item** | **Response options** | **Skip** |
| --- | --- | --- | --- | --- |
| 2001 | Was the mother diagnosed for hypertensive disorder of pregnancy? | | YES. ………………1  NO ……………… 2 | If NO (2) go to Q2003 |
| 2002 | Specify the type of the hypertensive disorder of pregnancy | | PRE-EXLAMPSIA. ………………1  ECLAMPSIA ……………… 2  SUPER-IMPOSED PRE-ECLAMPSIA.………………3  CHRONIC HYPERTENSION …………4  TRANSIENT/GESTATIONAL HYPERTENSION. ………………5  UNSPECIFIED HYPERTENSION (INCOMPLETE INFORMATION TO SPECIFY) ……………… 6 |  |
| 2003 | Was the mother diagnosed for APH? | | YES. ………………1  NO ……………… 2 | If NO (2) go to Q2005 |
| 2004 | Specify the type of the APH | | PLACENTA PREVIA………………1  ABRUPTIO PLACENTA ………………2  OTHER (SPECIFY) ……………… 3  ____________________________  UNIDENTIFIED CAUSE……………… 4 |  |
| 2005 | Was the fetus diagnosed with intrauterine growth restriction (IUGR)? | | YES. ………………1  NO ……………… 2 |  |
| 2006 | Was there premature rupture of membrane (PROM)? | | YES. ………………1  NO ……………… 2 | If NO (2) go to Q2008 |
| 2007 | Specify the duration for PROM (total number hours from rapture of membrane to delivery of the baby) | | [___|___] HOURS |  |
| 2008 | Was the mother diagnosed for obstructed labour? | | YES. ………………1  NO ……………… 2 | If NO (2) go to Q2010 |
| 2009 | Specify what causes the obstructed labour | | CPD………………1  CONTRACTED PELVIS ………………2  MALPRESENTATION & MALPOSITION……………… 3  CONGENITAL MALFORMATION…………… 4  OTHER (SPECIFY)……………… 5  ____________________________ |  |
| 2010 | Was the mother diagnosed with ruptured uterus? | | YES. ………………1  NO ……………… 2 | If NO (2) go to Q2012 |
| 2011 | Specify what caused the ruptured uterus | | CPD………………1  BIG BABY ………………2  MALPRESENTATION & MALPOSITION……………… 3  CONGENITAL MALFORMATION…………… 4  OTHER (SPECIFY)……………… 5  ____________________________ |  |
| 2012 | Was the mother diagnosed with Tuberculosis? | | YES. ………………1  NO ……………… 2 | If NO (2) go to Q2014 |
| 2013 | Specify the type of Tuberculosis | | PULMONARY………………1  EXTRA-PULMONARY ………………2  INTESTINAL ……………… 3  OTHER (SPECIFY)……………… 4  ____________________________ |  |
| 2014 | Was the mother diagnosed with Diabetes Mellitus? | | YES. ………………1  NO ……………… 2 | If NO (2) go to Q2016 |
| 2015 | Specify the type of Diabetes Mellitus | | GESTATIONAL. ………………1  PRE-GESTATIONAL. ………………2  UNDEFINED. ………………3 |  |
| 2016 | Was the mother diagnosed with Cardiac Disease? | | YES. ………………1  NO ……………… 2 | If NO (2) go to Q2018 |
| 2017 | Specify the type of the cardiac disease | | CONGENITAL. ………………1  RHEUMATIC HEART DISEASE. ………2  OTHERS (SPECIFY). ………………3  ____________________________ |  |
| 2018 | Was the mother diagnosed with Chorioamnionitis? | | YES. ………………1  NO ……………… 2 |  |

**SECTIO THREE: LABOUR AND DELIVERY**

| **Code** | **Item** | **Response options** | **Skip** |
| --- | --- | --- | --- |
| 3001 | Condition at admission to labour ward or operation room (OR) | BOOKED MOTHER. ………………1  SELF REFERRED IN LABOUR………2  REFERRED IN LABOUR FROM OTHER HOSPITAL………………3  REFERRED FROM HEALTH CENTER………………4  OTHER (SPECIFY) ……………… 5  ____________________________ |  |
| 3002 | Time of onset of labour | DATE (DD/MM/YYYY)[____/____/________]  TIME (HH/MM)[____/____] AM/PM |  |
| 3003 | Time of admission to labour ward | DATE (DD/MM/YYYY)  [____/____/________]  TIME (HH/MM)[____/____] AM/PM |  |
| 3004 | Time of delivery of the baby | DATE (DD/MM/YYYY)  [____/____/________]  TIME (HH/MM)[____/____] AM/PM |  |
| 3005 | Overall duration of the labour and delivery | [___|___] HRS PLUS [___|___] MINS |  |
| 3006 | Day of delivery  CIRCLE ALL THAT APPLY | WORKING DAY. ………………1  WEEKEND. ………………2  HOLIDAY. ………………3 |  |
| 3007 | Hour of delivery | WORKING HOURS. ………………1  DUTY HOURS ……………… 2 |  |
| 3008 | Onset of labour | SPONTANEOUS. ………………1  INDUCED. ………………2  ELECTIVE C/S. ………………3 | Go to Q3011  Go to Q3009 |
| 3009 | If labour was induced specify indications for induction | FETAL DISTRESS. ………………1  IUGR/SGA ……………… 2  PRE-ECLAMPSIA/ECLAMPSIA.………………3  MACROSOMIA. ………………4  POSTTERM PREGNANCY……………5.  OTHER (SPECIFY). ………………6  _________________________ |  |
| 3010 | If labour was induced specify the drugs used for induction | PITOCIN…………….1  MISOPROSTOL WITH PITOCIN………2  DINOPROSTOL WITH PITOCIN………..3  OTHER (SPECIFY). ………………4  Cervical ripening………………..5  Amniotomy……………….…6 |  |
| 3011 | Was labor augmented? | YES. ………………1  NO ……………… 2 | If NO (2) go to Q3013 |
| 3012 | What was the indication for augmentation of labour? | PROLONGED LATENT PHASE. ………1  PROTRACTION DISORDER OF FIRST STAGE OF LABOR………………2  PROTRACTION OF DECENT.………3  SECONDARY ARREST OF FIRST STAGE LABOR………………4  ARREST OF DECENT. ………………5  OTHER (SPECIFY) ……………… 6  _________________________ |  |
| 3013 | Was fetal heartbeat (FHB) taken up on admission? | YES. ………………1  NO ……………… 2  ABSENT (IUFD) ……………… 3 | If NO (2) go to Q3015 |
| 3014 | What was the FHB upon admission (beats per minute) | [___|___|___] BPM |  |
| 3015 | Was the FHB monitored during labour (intra-partum)? | YES. ………………1  NO ……………… 2 | If NO (2) go to Q3017 |
| 3016 | How was the FHB monitored during labour (intra-partum)? Observe from the medical chart | BY PENIARD/DOPPLER STETHOSCOPE EVERY 30 MIN. ……1  BY PENIARD/DOPPLER STETHOSCOPE RANDOMLY………2  CONTINUOUS CTG MONITORING…3  RANDOM CTG MONITORING ……4  FHB WAS NOT AUDIBLE DURING LABOUR. ………………5  OTHER (SPECIFY) ……………… 6  ____________________________ |  |
| 3017 | The FHB immediately before delivery (at least during the last 30 min before birth of the baby) was | >160BPM. ………………1  121 – 160BPM ……………… 2  90-120BPM………………3  <90BPM ………… 4  NOT COUNTED/UNKNOWN. ………5 |  |
| 3018 | What was the mode of delivery? | SVD. ………………1  FORCEPS ……………… 2  VACUUM.………………3  VAGINAL BREECH ………… 4  CS. ………………5  LAPAROTOMY……………… 6  DESTRUCTIVE DELIVERY …………7 | **Go to Q4001**  **Go to Q3021**  **Go to Q3021**  **Go to Q4001**  **Go to Q3019**  **Go to Q4001**  **Go to Q4001** |
| 3019 | In case of CS deliveries specify the type of CS? | ELECTIVE. ………………1  EMERGENCY ……………… 2 |  |
| 3020 | In case of CS delivery specify the indications for the CS delivery | FETAL DISTRESS. ………………1  IUGR/SGA ……………… 2  PRE-ECLAMPSIA/ ECLAMPSIA.………………3  CORD PROLAPSE ………… 4  MACROSOMIA. ………………5  BREECH……………… 6  MULTIPLE PREGNANCY …………7  PROLONGED/ OBSTRUCTED LABOUR. ………………8  OTHER (SPECIFY). ………………9  _________________________ |  |
| 3021 | In case of forceps/vacuum delivery specify the indications for the forceps/vacuum delivery | FETAL DISTRESS. ………………1  PROLONGED SECOND STAGE ………2  POOR MATERNAL EFFORT.…………3  TO SHORTEN SECOND STAGE OF LABOR ………………4  OTHER (SPECIFY). ………………5  _________________________ |  |
| 3022 | Were antibiotics given to mother at any time during pregnancy and labour? | YES. ………………1  NO ……………… 2 | If NO (2) go to Q3026 |
| 3023 | When were antibiotics given?  CIRCLE ALL THAT APPLY | 1ST TRIMESTER. ………………1  2ND TRIMESTER. ………………2  3RD TRIMESTER. ………………3  LABOUR. ………………3 |  |
| 3024 | For how long did the mother take the antibiotics?  ADD TOTAL NUMBER OF DAYS THE MOTHER TOOK ANTIBIOTICS DURING PREGNANCY | [___|___] DAYS |  |
| 3025 | Which antibiotic did the mother receive?  DO NOT READ THE OPTIONS. CIRCLE ALL THAT ARE MENTIONED | PENICILLIN. ………………1  AMPICILLIN ……………… 2  GENTAMICIN.………………3  METRONIDAZOLE ………… 4  CEPHALOSPORIN. ………………5  OTHER (SPECIFY) ……………… 6  ____________________________  UNKNOWN ……………… 7 |  |
| 3026 | Were drugs other than antibiotics given to mother at any time during pregnancy? | YES. ………………1  NO ……………… 2 | Go to Q4001 |
| 3027 | When were drugs other than antibiotics given during pregnancy and labour?  CIRCLE ALL THAT APPLY | 1ST TRIMESTER. ………………1  2ND TRIMESTER. ………………2  3RD TRIMESTER. ………………3  LABOUR. ………………3 |  |
| 3028 | For how long did the mother take the drugs other than antibiotics?  ADD TOTAL NUMBER OF DAYS THE MOTHER TOOK DRUGS OTHER THAN ANTIBIOTICS DURING PREGNANCY | [___|___] DAYS |  |
| 3029 | Which drugs other than antibiotic did the mother receive? (SPECIFY) | NAME OF THE DRUG (1): _______________________________  NAME OF THE DRUG (2): _______________________________  NAME OF THE DRUG (3): _______________________________ |  |

**SECTIO FOUR: BIRTH OUTCOMES**

| **Code** | **Item** | **Response options** | **Skip** |
| --- | --- | --- | --- |
| 4001 | Number of delivery | Singleton. ……………1  Twin. ……………2  Triplet. ………………3  Other (Specify). ………………4  _________________________ |  |
| 4002 | Weight of the newborn in grams | [___|___|___|___] GRAMS |  |
| 4003 | Sex of the newborn | Male. ………………1  Female ……………… 2 |  |
| 4004 | Record outcome for the mother | GOES TO POSTNATAL WARD. ……1  GOES TO SURGERY ……………… 2  GOES TO ICU.………………3  DIED ………… 4  OTHER (SPECIFY)…………5  ____________________________ |  |
| 4005 | Record outcome for the newborn or fetus | GOES TO WARD WITH MOTHER..…1  GOES TO SURGERY…..…….……… 2  GOES TO NICU……..…...……………3  BORN ALIVE BUT DIED…………… 4  FRESH STILLBIRTH…..…….………5  MACERATED STILLBIRTH…………6  OTHER (SPECIFY)……………………7  ____________________________ | Go to Q4016  Go to Q4016  Go to Q4016  Go to Q4006  Go to Q4006  Go to Q4006 |
| 4006 | Timing of fetal death | ANTEPARTUM DEATH. ……………1  INTRA-PARTUM DEATH. ……………2  NEONATAL DEATH. ………………3  UNKNOWN. ………………4 |  |
| 4007 | Time of fetal death | DATE (DD/MM/YYYY)  [____/____/________]  TIME (HH/MM)[____/____]AM/PM |  |
| 4008 | Day of death  CIRCLE ALL THAT APPLY | WORKING DAY. ………………1  WEEKEND. ………………2  HOLIDAY. ………………3 |  |
| 4009 | Hour of death | WORKING HOURS. ………………1  DUTY HOURS ……………… 2 |  |
| 4010 | Weight of the newborn at death in grams | [___|___|___|___] GRAMS |  |
| 4011 | Age of the newborn at the time of death | [___|___] HOURS  [___|___] MINUTES |  |
| 4012 | Specify the cause of the fetal death (based on physician classification) | Cause of fetal death (physician)  ____________________________ |  |
| 4013 | Mother consented to do autopsy | YES. ………………1  NO ……………… 2 | If NO (2) go to Q4016 |
| 4014 | Autopsy sent for diagnosis | YES. ………………1  NO ……………… 2 | If NO (2) go to Q4016 |
| 4015 | Result of the autopsy (cause of death based on autopsy) | Cause of fetal death (autopsy)  ____________________________ |  |
| 4016 | Was there any genetic or additional infectious tests done? | YES. ………………1  NO ……………… 2 |  |
| 4017 | What were the results of the genetic or additional infections tests? (SPECIFY) | TYPE OF TEST (1): _________________  FINDING (1): _________________  TYPE OF TEST (2): _________________  FINDING (2): _________________  TYPE OF TEST (3): _________________  FINDING (3): _________________ |  |
| 4018 | Was there any placental abnormality detected? | YES. ………………1  NO ……………… 2 |  |
| 4019 | Was placenta sent for examination? | YES. ………………1  NO ……………… 2 |  |
| 4020 | What was the Histopatholgic test result of the placenta? | HISTOPATHOLOGIC TEST RESULT  ____________________________ |  |
| 4021 | Was there any cord abnormality detected? | YES. ………………1  NO ……………… 2 |  |
| 4022 | What was the detected cord abnormality? | CORD ABNORMALITY  ____________________________ |  |

**SESSION FIVE: MEDICAL CONDITIONS OF THE FETUS AND NEWBORN**

| **Code** | **Item** | **Response options** | **Skip** |
| --- | --- | --- | --- |
| 5001 | Apgar score of newborn | [___|___] 1ST MINUTE  [___|___] 5TH MINUTE |  |
| 5002 | Did the newborn have any congenital abnormality? | YES. ………………1  NO ……………… 2 | If NO (2) go to Q5004 |
| 5003 | What type of gross congenital abnormality did the newborn have? Get digital evidence | TYPE OF ABNORMALITY  ____________________________  ____________________________ |  |
| 5004 | GA by Ballard Score | [___|___] WKs |  |
| 5005 | Was feeding of the newborn started? | YES. ………………1  NO ……………… 2 | If NO (2) go to Q5007 |
| 5006 | Types of feeding (SPECIFY) | BREASTMILK ONLY. ……………1  FORMULA FEED ONLY. ……………2  MIXED FEED. ………………3  OTHER FEED (SPECIFY). ……………4  ____________________________ |  |
| 5007 | Has the infant been put to breast or breastfed? | YES. ………………1  NO ……………… 2 | If NO (2) go to Q5009 |
| 5008 | How many hours after birth was the baby first put to the breast? | [___|___] HOURS |  |
| 5009 | Was temperature of the newborn taken on admission? | YES. ………………1  NO ……………… 2 | If NO (2) go to Q5011 |
| 5010 | Temperature of the newborn on admission (axillary in 0C) | [___|___]0C |  |
| 5011 | HCT text was done? | YES. ………………1  NO ……………… 2 | If NO (2) go to Q5013 |
| 5012 | What was the result of the HCT (%) test? | [___|___|___|___] |  |
| 5013 | Random blood sugar test done? | YES. ………………1  NO ……………… 2 | If NO (2) go to Q5015 |
| 5014 | What was the result of the random blood sugar (first evaluation) test in mg/dl? | [___|___|___|___] |  |
| 5015 | Blood culture done? | YES. ………………1  NO ……………… 2 | If NO (2) go to Q5017 |
| 5016 | Specify the type of bacteria from the blood culture | BLOOD CULTURE RESULT  _______________________________ |  |
| 5017 | Laboratory test findings other than those stated above | TYPE OF TEST (1): _________________  FINDING (1): _________________  TYPE OF TEST (2): _________________  FINDING (2): _________________  TYPE OF TEST (3): _________________  FINDING (3): _________________ |  |
| 5018 | Did the newborn have convulsion, unconsciousness or abnormal movements? | YES. ………………1  NO ……………… 2 |  |
| 5019 | Did the newborn have respiratory distress? | YES. ………………1  NO ……………… 2 |  |
| 5020 | Did the newborn have birth asphyxia? | YES, GRADE I. ………………1  YES, GRADE II. ………………2  YES, GRADE III. ………………3  NO ………………4 |  |
| 5021 | Did the newborn have sepsis? | YES. ………………1  NO ……………… 2  UNDETERMINED ………………3 |  |
| 5022 | Did the newborn have hypothermia? (Temperature less than 36.5 0C) | YES. ………………1  NO ……………… 2 | If NO (2) go to Q5024 |
| 5023 | Did the newborn have severe hypothermia? (Temperature less than 32 0C) | YES. ………………1  NO ……………… 2 |  |
| 5024 | Did the neonate have other neonatal illnesses? | SPECIFY THE ILLNESSES  ____________________________ |  |
| 5025 | Was any surgical procurers done for the newborn? | YES. ………………1  NO ……………… 2  SPECIFY THE SURGICAL PROCEDURE  _________________________________  ________________________________ |  |

**Thank You**

**END HERE!**
